# Supplementary material
Source: PubMed Central journal article supplement (PMC2787751)
Supplement: NIHMS150459-supplement-01.pdf [file NIHMS150459-supplement-01.pdf]

# Plant-made vaccine antigens and biopharmaceuticals

Henry Daniell<sup>1</sup>, Nameirakpam D. Singh<sup>1</sup>, Hugh Mason<sup>2</sup> and Stephen J. Streatfield<sup>3</sup>

<sup>1</sup>Department of Molecular Biology and Microbiology, University of Central Florida, College of Medicine, 336 Biomolecular Science Building, Orlando, FL 32816-2364, USA

<sup>2</sup>Biodesign Institute and School of Life Sciences, Arizona State University, 1001 S. McAllister Avenue, Tempe, AZ 85287, USA

<sup>3</sup>Fraunhofer USA Inc., Center for Molecular Biotechnology, 9 Innovation Way, Newark, DE 19711, USA

Corresponding author: Daniell, H. (daniell@mail.ucf.edu)

**Table S1. Vaccine antigens expressed via the plant nuclear genome**

| Antigen                                                                                                                                 | Expression system                                    | Expression level                        | Functional evaluation                                                                                   | Refs                               |
|-----------------------------------------------------------------------------------------------------------------------------------------|------------------------------------------------------|-----------------------------------------|---------------------------------------------------------------------------------------------------------|------------------------------------|
| <b>Human vaccines Stable expression</b>                                                                                                 |                                                      |                                         |                                                                                                         |                                    |
| <b>Bacterial antigens</b>                                                                                                               |                                                      |                                         |                                                                                                         |                                    |
| Enterotoxigenic <i>E. coli</i> Heat-labile toxin B subunit (LTB)                                                                        | Tobacco leaf                                         | 0.001% TSP                              | Immunogenic and protective in mice after oral administration                                            | [S1]                               |
|                                                                                                                                         | Potato tuber                                         | 0.19% TSP                               | Immunogenic and protective by oral delivery to mice                                                     | [S2]                               |
|                                                                                                                                         | Potato tuber                                         | 7.3 to 17.2 $\mu\text{g g}^{-1}$ FW     | Immunogenic in mice and human after oral administration                                                 | [S3]                               |
|                                                                                                                                         | Maize seeds                                          | 0.01-0.05% TSP                          | Immunogenic and protective in mice after oral administration                                            | [S4]                               |
|                                                                                                                                         | Maize seeds                                          | 0.8% TSP                                | Immunogenic response in mice after oral administration                                                  | [S5]                               |
|                                                                                                                                         | Potato tuber                                         | 17 $\mu\text{g g}^{-1}$ FW              | Immunogenic in mice following oral administration                                                       | [S6]                               |
|                                                                                                                                         | Carrots                                              | 0.3% TSP                                | Immunogenic and protective against CT challenge                                                         | [S7]                               |
|                                                                                                                                         | Corn                                                 | Not Reported                            | Immunogenic in human following oral administration                                                      | [S8]                               |
|                                                                                                                                         | Soybean                                              | 1.8-2.4% TSP                            | Immunogenic and partial protection against LT challenge in mice                                         | [S9]                               |
|                                                                                                                                         | Enterotoxigenic <i>E. coli</i> fimbrial subunit FanC | Lettuce                                 | 1.0-2.0% TSP                                                                                            | Strong affinity to GM1-ganglioside |
| Soybean                                                                                                                                 |                                                      | 0.4-0.5% TSP                            | Immunogenic by intraperitoneal delivery in mice.                                                        | [S11]                              |
| Cholera toxin B subunit (CTB)                                                                                                           | Potato tuber                                         | 0.3% TSP                                | Immunogenic and protective immunity in mice against bacterial enterotoxin following oral administration | [S12,S13]                          |
|                                                                                                                                         | Tomato, leaves                                       | 0.02% TSP                               | Strong affinity to GM1-ganglioside                                                                      | [S14]                              |
|                                                                                                                                         | Fruits                                               | 0.03-0.04% TSP                          |                                                                                                         |                                    |
|                                                                                                                                         | Tomato                                               | 0.034-0.081% TSP                        | Immunogenic by oral delivery to mice                                                                    | [S15]                              |
|                                                                                                                                         | Rice                                                 | 2.1% TSP                                | Immunogenic and protective against CT challenge to mice following oral administration                   | [S16]                              |
|                                                                                                                                         | Carrot                                               | 0.48% TSP                               | Strong affinity for GM1-ganglioside                                                                     | [S17]                              |
|                                                                                                                                         | Rice                                                 | 1.5-2.1% TSP                            | Strong affinity for GM1-ganglioside                                                                     | [S18]                              |
|                                                                                                                                         | Lettuce                                              | 0.16-0.24% TSP                          | Strong affinity for GM1-ganglioside                                                                     | [S19]                              |
|                                                                                                                                         | Tomato leaves                                        | 0.0003-0.06 and 0.006- 0.02% TSP or     | Not reported                                                                                            | [S20]                              |
|                                                                                                                                         | Fruits                                               | 0.006-0.25 and 0.06-0.08% TSP           |                                                                                                         |                                    |
| Toxin co-regulated pilus subunit A (TCPA) P4 or P6 epitope fused with CTB                                                               | Tomato                                               | 0.007-0.17 or 0.019-0.096% TSP          | Strong affinity for GM1-ganglioside                                                                     | [S21]                              |
| <i>Bacillus anthracis</i> protective antigen (PA)                                                                                       | Tobacco leaf                                         | Not Reported                            | Biological activity demonstrated by cytolytic assay on macrophage like cell lines with lethal factor    | [S22]                              |
| Cholera toxin B subunit fused to rotavirus and enterotoxigenic <i>E. coli</i> heat labile toxin B subunit Antigenic lipoprotein (Ag473) | Potato tuber                                         | Not Reported                            | Immunogenic and protective (passive immunity) by oral delivery to mice                                  | [S23]                              |
| Diphtheria–tetanus–pertussis (DTP)                                                                                                      | Rice leaves                                          | 0.18-0.6 or                             | Immunogenic in mice following intraperitoneal administration.                                           | [S24]                              |
|                                                                                                                                         | Seeds                                                | 0.05-0.75% TSP                          |                                                                                                         |                                    |
| Tuberculosis antigen ESAT6 fused to LTB                                                                                                 | Tobacco                                              | 0.2-0.3 mg 0.5 $\text{kg}^{-1}$ biomass | Induced strong antigen-specific antibody response in injected mice                                      | [S25]                              |
|                                                                                                                                         | Carrot cell suspension                               |                                         |                                                                                                         |                                    |
| Tuberculosis antigen ESAT6 fused to LTB                                                                                                 | <i>Arabidopsis</i>                                   | 11-24.5 $\mu\text{g g}^{-1}$ FW         | Strong affinity for GM1-ganglioside                                                                     | [S26]                              |

## Viral antigens

|                                                                                                     |                                |                                                                      |                                                                                                                                                                                                                    |            |
|-----------------------------------------------------------------------------------------------------|--------------------------------|----------------------------------------------------------------------|--------------------------------------------------------------------------------------------------------------------------------------------------------------------------------------------------------------------|------------|
| Hepatitis B virus (HBV) surface antigen                                                             | Tobacco leaf                   | 0.0002-0.0066 % TSP                                                  | Immunogenic by intraperitoneal delivery to mice                                                                                                                                                                    | [S27,S28]  |
|                                                                                                     | Potato                         | 8.5 $\mu\text{g g}^{-1}$ FW                                          | Immunogenic response in humans following oral administration                                                                                                                                                       | [S29]      |
|                                                                                                     | Potato                         | 8.35 and 1.1 $\mu\text{g g}^{-1}$ FW                                 | Immunogenic to mice following oral administration                                                                                                                                                                  | [S30, S31] |
|                                                                                                     | Lupin callus                   | 11-150 and                                                           | Immunogenic to mice by oral delivery                                                                                                                                                                               | [S32]      |
|                                                                                                     | Lettuce                        | 1-5.5 $\text{ng g}^{-1}$ FW                                          |                                                                                                                                                                                                                    |            |
|                                                                                                     | Potato                         | Not reported                                                         | Not reported                                                                                                                                                                                                       | [S33]      |
|                                                                                                     | Banana                         | 19.92-38 $\text{ng g}^{-1}$ FW                                       | Not reported                                                                                                                                                                                                       | [S34]      |
|                                                                                                     | Cherry                         |                                                                      | Plant-derived rHBsAg had same immunogenicity as commercial vaccine in stimulating production of HBsAg specific antibodies in animal                                                                                | [S35]      |
|                                                                                                     | tomatillo, Leaf                | 90-300 ng,                                                           |                                                                                                                                                                                                                    |            |
|                                                                                                     | Stem                           | 5-15 ng and                                                          |                                                                                                                                                                                                                    |            |
|                                                                                                     | Fruit                          | 6-7 $\text{ng g}^{-1}$ FW                                            |                                                                                                                                                                                                                    |            |
|                                                                                                     | Tomato, Fruit                  | 0.02% TSP                                                            | Not reported                                                                                                                                                                                                       | [S36]      |
|                                                                                                     | Tomato                         | 73.2-255.6 $\text{ng g}^{-1}$ DW                                     | Not reported                                                                                                                                                                                                       | [S37]      |
| Hepatitis B virus (HBV) surface S and preS2 antigens                                                | Potato                         | 0.03-0.09 and 0.003-0.012% TSP                                       | Immunogenic in mice                                                                                                                                                                                                | [S38,S39]  |
| Hepatitis B virus surface antigen fused with preS1 epitop                                           | Rice                           | 15.8-31.5 $\text{ng g}^{-1}$ DW                                      | Immunogenic by intraperitoneal delivery to mice                                                                                                                                                                    | [S40]      |
| Norwalk virus capsid protein (NVCP)                                                                 | Tobacco leave, potato tubers   | 0.23% TSP                                                            | Immunogenic by oral delivery to mice                                                                                                                                                                               | [S41]      |
|                                                                                                     | Potato tubers                  | 215-751 $\mu\text{g 150g}^{-1}$ FW                                   | Immunogenic by oral delivery to human                                                                                                                                                                              | [S42]      |
|                                                                                                     | Tomato Fruit and Potato        | 8 and 0.4 % TSP                                                      | Elicit systemic and mucosal antibody responses in mice following oral administration                                                                                                                               | [S43]      |
|                                                                                                     | Tomato                         | 20 $\mu\text{g g}^{-1}$ FW                                           | Immunogenic in mice                                                                                                                                                                                                | [S44]      |
| Rotavirus fused with cholera toxin B and enterotoxigenic <i>E. coli</i> heat labile toxin B subunit | Potato tubers                  | 0.01-0.1% TSP                                                        | Immunogenic by oral delivery to mice. Reduced symptoms following rotavirus challenge in pups                                                                                                                       | [S23,S45]  |
| Rotavirus capsid protein (VP6)                                                                      | Potato leaves                  | 0.006% TSP                                                           | Immunogenic in mice following intraperitoneal injection                                                                                                                                                            | [S46]      |
| Human group A rotavirus (VP6) protein                                                               | Potato tubers                  | 0.002% TSP                                                           |                                                                                                                                                                                                                    |            |
|                                                                                                     | Alfalfa                        | 0.06-0.28% TSP                                                       | Immunogenic in mice and offspring developed less severe diarrhea after challenge with simian rotavirus SA-11, indicating that antibodies generated in the dams provided passive heterotypic protection to the pups | [S47]      |
| Rotavirus (VP7)                                                                                     | Potato tubers                  | 0.3-0.4 % TSP                                                        | Immunogenic in mice following oral delivery. Neutralization activity against rotavirus                                                                                                                             | [S48,S49]  |
| Measles Haemagglutinin protein                                                                      | Tobacco leaf                   | Not Reported                                                         | Immunogenic by intraperitoneal or oral delivery to mice                                                                                                                                                            | [S50,S51]  |
|                                                                                                     | Carrot                         | Not reported                                                         | Immunization of mice with plant extracts induced high titres of IgG1 and IgG2a antibodies that cross-reacted strongly with the measles virus and neutralized the virus <i>in vitro</i>                             | [S52]      |
| SARS-CoV S protein (S1)                                                                             | Tomato and tobacco leaf        | 0.1% TSP                                                             | Immunogenic to mice following oral administration                                                                                                                                                                  | [S53]      |
| Respiratory syncytial virus (RSV)                                                                   | Tomato fruits                  | 1-32.5 $\mu\text{g g}^{-1}$ FW                                       | Immunogenic to mice following oral administration                                                                                                                                                                  | [S54]      |
| Human cytomegalovirus glycoprotein B                                                                | Tobacco seeds                  | 0.007-0.014% TSP                                                     | Not reported                                                                                                                                                                                                       | [S55]      |
| Human cytomegalovirus glycoprotein B (gB)                                                           | Rice                           | Not reported                                                         | Contained several neutralizing epitopes and stable over 27 months                                                                                                                                                  | [S56]      |
| Smallpox recombinant vaccine virus B5 antigenic domain (pB5)                                        | Tobacco and Collard leaf       | Not Reported                                                         | Antibody response in mice immunized parenterally and protects against lethal dose of vaccinia virus                                                                                                                | [S57]      |
| Human papillomavirus-like particles (HPV VLPs) L1 capsid protein                                    | Potato                         | 23 $\text{ng g}^{-1}$ FW                                             | Immune response in mice following parenteral administration                                                                                                                                                        | [S58]      |
| HPV-11 L1major capsid protein                                                                       | <i>Arabidopsis</i> and tobacco | 3-12 $\mu\text{g g}^{-1}$ or 0.2-2.2 $\mu\text{g g}^{-1}$ FW         | Weak immune response in rabbits and no neutralization activity                                                                                                                                                     | [S59]      |
| HPV major capsid protein L1                                                                         | Tobacco and potato             | 0.5 to 0.2% TSP                                                      | Plant-derived L1 was immunogenic in mice                                                                                                                                                                           | [S60]      |
| Human immunodeficiency virus (HIV-1) and hepatitis B virus (HBV) chimeric gene                      | Tomato                         | 0.3 $\text{ng mg}^{-1}$ DW                                           | Oral administration of plant-derived HIV/HBV vaccine antigen stimulates both serum and secretory HIV- and HBV-specific antibodies in mice                                                                          | [S61]      |
| HIV-1 subtype C p24 antigen                                                                         | <i>Arabidopsis</i>             | 0.5 $\text{mg g}^{-1}$ in stem and 0.2 $\text{mg g}^{-1}$ in leaf FW | Immunogenic in mice                                                                                                                                                                                                | [S62]      |
| HIV type 1 mucosal vaccine (CTB-MPR) membrane proximal (ectodomain) region of gp41                  | Tobacco leaf                   | 0.01-0.2% TSP                                                        | Affinity for GM1-ganglioside and immunogenic in mice after mucosal prime-systemic boost immunization                                                                                                               | [S63]      |

|                                                                               |                                                 |                                                       |                                                                                                                                                                                          |           |
|-------------------------------------------------------------------------------|-------------------------------------------------|-------------------------------------------------------|------------------------------------------------------------------------------------------------------------------------------------------------------------------------------------------|-----------|
| Japanese encephalitis virus (JEV) envelope protein (E)                        | Rice                                            | 1.1-1.9 $\mu\text{g mg}^{-1}$ TSP                     | JEV-specific neutralizing antibody detected in mice following intraperitoneal or oral administration                                                                                     | [S64]     |
| Canine parvovirus (CPV) 2L21                                                  | <i>Arabidopsis</i>                              | 0.15-3.3% TSP                                         | Immunogenic in mice following intraperitoneal or oral administration                                                                                                                     | [S65]     |
| Small pox vaccine candidate (B5)                                              | Collard                                         | Not reported                                          | Not reported                                                                                                                                                                             | [S66]     |
| Viral spike protein (SARS antigen)                                            | Cauliflower                                     |                                                       |                                                                                                                                                                                          |           |
| Surface glycoprotein (G protein) of rabies virus                              | Tobacco                                         | 0.001-0.38% TSP                                       | Plant-derived G protein induced complete protective immunity in mice against intracerebral lethal challenge with live rabies virus                                                       | [S67]     |
| Tumor-associated colorectal cancer antigen EpCAM                              | Tobacco                                         | 10 mg $\text{kg}^{-1}$ FW                             | Induced humoral immune response in immunized mice. Sera from immunized mice efficiently inhibited the growth of SW948 colorectal carcinoma cells                                         | [S68]     |
| <b>Protozoan antigens</b>                                                     |                                                 |                                                       |                                                                                                                                                                                          |           |
| Plasmodium yoelii merozoite surface protein (PyMSP4/5)                        | Tobacco                                         | 0.02-0.04% TSP                                        | Induce antigen-specific antibodies in mice following parenteral delivery                                                                                                                 | [S69]     |
| <b>Human vaccines (Viral/Transient expression)</b>                            |                                                 |                                                       |                                                                                                                                                                                          |           |
| <b>Bacterial antigens</b>                                                     |                                                 |                                                       |                                                                                                                                                                                          |           |
| Tuberculosis antigen ESAT6                                                    | Tobacco leaf (Potato virus X)                   | 0.5-1% TSP                                            | Not reported                                                                                                                                                                             | [S70]     |
| <i>Yersinia pestis</i> F1 and LcrV antigens                                   | Tobacco leaf tissue                             | 380 and 120 $\mu\text{g g}^{-1}$ FW                   | Immunogenic and protective in monkeys against <i>Y. pestis</i> following subcutaneous injection                                                                                          | [S71]     |
|                                                                               | Tobacco                                         | 17 $\mu\text{g g}^{-1}$ FW                            | Immunogenic in mice and protection in Cynomolgus Macaques against aerosolized <i>Y. pestis</i>                                                                                           | [S72]     |
| <i>Yersinia pestis</i> F1-V and F1 antigens                                   | Tobacco leaf (TMV)                              | 1 and 2mg $\text{g}^{-1}$                             | Immunogenic and protection in vaccinated guinea pigs against <i>Y. pestis</i> aerosol challenge                                                                                          | [S73]     |
| <i>Staphylococcus aureus</i> D2 peptide of fibronectin-binding protein (FnBP) | Tobacco leaf (CPMV) or (Potato virusX)          | 1.2 mg $\text{g}^{-1}$ or 0.2mg $\text{g}^{-1}$ FW    | Immunogenic to mice and rats following subcutaneous injection. Mice and rat sera completely inhibit the binding of fibronectin                                                           | [S74]     |
| <i>Pseudomonas aeruginosa</i> outer membrane protein F                        | Cowpea leaf (CPMV)                              | 1-1.2 mg $\text{g}^{-1}$ FW                           | Immunogenic and protective in mice following subcutaneous injection                                                                                                                      | [S75]     |
|                                                                               | Tobacco leaf (Tobacco mosaic virus)             | Not Reported                                          | Immunogenic and protective in mice following intramuscular or subcutaneous injection                                                                                                     | [S76]     |
| <i>Bacillus anthracis</i> protective antigen (PA)                             | Tobacco                                         | Not reported                                          | Immunogenic and were able to neutralized the effects of LeTx <i>in vitro</i>                                                                                                             | [S77]     |
| <i>Bacillus anthracis</i> protective antigen (PA-D4s)                         | Tobacco (Alfalfa mosaic virus)                  | 0.3 mg $\text{g}^{-1}$ FW                             | Immunogenic in mice                                                                                                                                                                      | [S78]     |
| <b>Viral antigens</b>                                                         |                                                 |                                                       |                                                                                                                                                                                          |           |
| HIV type 1 peptide of gp41 protein                                            | Cowpea leaf (Cowpea mosaic virus)               | 1.2-1.5 mg $\text{g}^{-1}$ FW                         | Immunogenic in rabbit                                                                                                                                                                    | [S79]     |
| HIV type 1 V3 loop of gp120 protein                                           | Tobacco leaf (Alfalfa mosaic virus)             | Not Reported                                          | Immunogenic in mice following intraperitoneal administration                                                                                                                             | [S80]     |
| HIV type 1 peptide of V3 loop of gp120 protein                                | Tobacco leaf (Tomato bushy stunt virus)         | 0.9 mg $\text{g}^{-1}$ FW                             | Immunogenic in subcutaneously injected mice                                                                                                                                              | [S81]     |
| HIV type 1 peptide of transmembrane protein gp41                              | Cowpea leaf (Cowpea mosaic virus)               | Not Reported                                          | Immunogenic in mice following subcutaneous, nasal or oral delivery                                                                                                                       | [S82,S83] |
| HIV type 1 glycoprotein (gp) 41                                               | Tobacco leaf (Potatovirus X)                    | Not Reported                                          | Immunogenic in mice following intraperitoneal or nasal delivery and inhibit syncytium formation                                                                                          | [S84]     |
| HIV entry inhibitors red algal protein griffithsin (GRFT)                     | Tobacco (TMV)                                   | 1 g $\text{kg}^{-1}$ FW                               | Active against HIV at picomolar concentrations, directly virucidal via binding to HIV envelope glycoproteins and capable of blocking cell-to-cell HIV transmission                       | [S85]     |
| Human rhinovirus type 14 peptide of VP1 protein (HRV 14)                      | Cowpea leaf (Cowpea mosaic virus)               | 1.2-1.5 mg $\text{g}^{-1}$ FW                         | Immunogenic in rabbits following intramuscularly or subcutaneous injection                                                                                                               | [S79]     |
| Respiratory syncytial virus (RSV) peptide of G protein                        | Tobacco leaf (Alfalfa mosaic virus)             | 0.8mg $\text{g}^{-1}$ FW                              | Immunogenic and protective in mice against viral following intraperitoneal injection                                                                                                     | [S86]     |
| Rabies virus glycoprotein and nucleoprotein (NF1-g24 & Av/A4-g24)             | Tobacco and spinach leaf (Alfalfa mosaic virus) | 0.4 mg $\text{g}^{-1}$ and 60 $\mu\text{g g}^{-1}$ FW | Immunogenic and protection in intraperitoneally injected mice when challenged intramuscularly with canine street rabies virus 3374L. Immunogenic in humans following oral administration | [S87]     |

|                                                                                               |                                    |                                |                                                                                                                                                      |       |
|-----------------------------------------------------------------------------------------------|------------------------------------|--------------------------------|------------------------------------------------------------------------------------------------------------------------------------------------------|-------|
| Smallpox recombinant vaccine virus B5 antigenic domain (pB5)                                  | Tobacco leaf transient             | Not Reported                   | Antibody response in mice immunized perenterally and protection against lethal dose of vaccinia virus                                                | [S57] |
|                                                                                               | Tobacco leaf transient             | Not Reported                   | Immunogenic in mice following intramuscularly or intranasally administration                                                                         | [S88] |
| Human papillomavirus (HPV) type 16 E7 protein                                                 | Tobacco leaf (Potato virus X, PVX) | 3-4 $\mu\text{g g}^{-1}$ FW    | Immunogenic in mice following subcutaneous injection and protects from tumor development after challenge with the E7-expressing C3 tumoral cell line | [S89] |
| Rotavirus major inner capsid protein (VP6)                                                    | Tobacco (PVX)                      | 50 $\mu\text{g g}^{-1}$ FW     | Not reported.                                                                                                                                        | [S90] |
| Human Papilloma Virus (HPV) E7 encoprotein or E7 fused to $\beta$ --1,3-1,4-glucanase (LicKM) | Tobacco                            | 400 $\text{mg kg}^{-1}$ FW     | Immunogenic and protective in mice challenged with E7-expressing tumor cells following subcutaneous injection.                                       | [S91] |
| Non-tumourigenic E7 protein of HPV16                                                          | Tobacco                            |                                | Inhibition of tumor growth and increased survival was observed in C57BL/6 mice                                                                       | [S92] |
| Encoding domain III of the dengue 2 envelope protein (D2EIII)                                 | Tobacco (Tobacco mosaic virus)     | 0.28% TSP                      | Retains antigenicity and immunogenicity as well as inducing neutralizing antibodies in vaccinated animals.                                           | [S93] |
| Pathogenic avian influenza virus (H5N1 subtype)                                               | Tobacco                            | 60 $\text{mg kg}^{-1}$ FW      | Immunogenic in mice and ferret and also protects ferrets against challenge infection with virus                                                      | [S94] |
| Pathogenic avian influenza virus (HPAI)                                                       | Tobacco                            | 400 $\text{mg kg}^{-1}$ FW     | Immunogenic in mice                                                                                                                                  | [S95] |
| H5N1 avian influenza virus hemagglutinin (HA)                                                 | Tobacco                            | 1 $\text{mg kg}^{-1}$ FW       | Induced immune response in mice but no neutralizing activities in a virus micro-neutralization or hemagglutination inhibition assay                  | [S96] |
| Hepatitis B virus (HBV) surface antigen                                                       | Tomato                             | 64.4-489 $\text{ng g}^{-1}$ DW | Not reported                                                                                                                                         | [S37] |

**Table S2. Bio-pharmaceutical proteins expressed via the plant nuclear genome**

| Pharmaceutical protein                                                       | Expression system              | Expression level                     | Functional evaluation                                                                                                                                                                                                                                            | Refs   |
|------------------------------------------------------------------------------|--------------------------------|--------------------------------------|------------------------------------------------------------------------------------------------------------------------------------------------------------------------------------------------------------------------------------------------------------------|--------|
| Human interleukin-2 (IL-2) and (IL-4)                                        | Tobacco suspension cells       | 0.10 and 0.18 $\mu\text{g ml}^{-1}$  | Both secreted lymphokines have biological activity as determined by cell proliferation of murine CTLL-2 / CTLL-2 cell line                                                                                                                                       | [S97]  |
| Human $\alpha$ 1-antitrypsin (AAT)                                           | Rice suspension cells          | 4.6-5.7 $\text{mg g}^{-1}$ dry cells | Not reported                                                                                                                                                                                                                                                     | [S98]  |
| Human growth hormone (hGH)                                                   | Tobacco seeds                  | 0.07-0.16% TSP                       | Radioreceptor binding assay showed same receptor-binding properties as the native mature hormone                                                                                                                                                                 | [S99]  |
| Human serum albumin (HSA)                                                    | Potato                         | 0.032-0.2% TSP                       | Mature HSA sequence was efficiently and reliably processed in potato                                                                                                                                                                                             | [S100] |
| Human lysozyme (Hlys)                                                        | Rice calli or suspension cells | 0.25-2.5 or 3-4.2% TSP               | Significant bactericidal activity in <i>Micrococcus lysodeikticus</i> and <i>E. coli</i> cells when exposed to recombinant human lysozyme. Both native and recombinant human lysozyme displayed the same thermostability and resistance to degradation by low pH | [S101] |
| Recombinant human granulocyte-macrophage colony stimulating factor (hGM-CSF) | Rice suspension cells          | 4-73 $\text{mg g}^{-1}$ cells DW     | Recombinant hGM-CSF supported growth of hGM-CSF-dependent TF-1 cells showing biologically active                                                                                                                                                                 | [S102] |
| Human interleukin-18 (hIL-18)                                                | Tobacco                        | 0.004-0.05% TSP                      | Plant-produced hIL-18 stimulated IFN- $\gamma$ production on J6-1 cells showing biological activity                                                                                                                                                              | [S103] |
| Interferon-gamma (IFN- $\gamma$ )                                            | Rice suspension cells          | Upto 700 $\text{ng g}^{-1}$ cell     | Conferred an effective antiviral activity as was evident by the inhibition of dengue virus infection in human A549 cells                                                                                                                                         | [S104] |
| Human epidermal growth factor (hEGF)                                         | Tobacco                        | 0.00001-0.11% TSP                    | Biologically active in cumulus cells expansion assays                                                                                                                                                                                                            | [S105] |
| Human insulin-like growth factor-1 (hIGF-1)                                  | Tobacco /rice                  | 0.02 and 0.03% TSP                   | Recombinant plants-derived rthIGF-1 is effective in stimulating the <i>in vitro</i> growth and proliferation of human SHSY5Y neuroblastoma cells                                                                                                                 | [S106] |
| Human insulin-like growth factor binding protein-3 (hIGFBP-3)                | Tobacco seeds                  | 800 $\mu\text{g DW}^{-1}$            | Not reported                                                                                                                                                                                                                                                     | [S107] |
| Human insulin-like growth factor 1(hIGF-1)                                   | Rice seeds                     | 6.8% TSP                             | Biologically active <i>in vitro</i> in MCF-7 cell culture cell proliferation assays and reduced blood glucose of diabetic mice following oral delivery                                                                                                           | [S108] |
| Human insulin (CTB-insulin)                                                  | Potato                         | 0.1% TSP                             | Strong affinity for GM1-ganglioside and reduction in pancreatic islet inflammation and also delayed in the progression of clinical diabetes in NOD mice                                                                                                          | [S109] |

|                                                                          |                          |                                           |                                                                                                                                                                                                                                                                  |             |
|--------------------------------------------------------------------------|--------------------------|-------------------------------------------|------------------------------------------------------------------------------------------------------------------------------------------------------------------------------------------------------------------------------------------------------------------|-------------|
| Recombinant human insulin                                                | <i>Arabidopsis</i> seeds | 0.13% TSP                                 | Biologically active <i>in vivo</i> and <i>in vitro</i> as demonstrated by insulin tolerance test in mice and phosphorylation assay performed in a mammalian cell culture system                                                                                  | [S110]      |
| B chain of human Insulin (CTB-InsB3)                                     | Tobacco                  | 0.08-0.11%TSP                             | Strong affinity for GM1-ganglioside                                                                                                                                                                                                                              | [S111]      |
| Human GAD65 (hGAD65) and murine IL-4                                     | Tobacco                  | 0.04, 0.1% TSP                            | Combine feeding of IL-4 plus GAD in NOD mice delayed the onset of diabetes                                                                                                                                                                                       | [S112]      |
| Human lactoferrin (hLF)                                                  | Rice                     | 0.5% TSP                                  | Not reported                                                                                                                                                                                                                                                     | [S113]      |
| Human acid $\beta$ -glucosidase                                          | Tobacco seeds            | Not reported                              | Plant-derived GCCase is uptaken by fibroblasts of a Gaucher Type-II patient and lacks potentially immunogenic glycans                                                                                                                                            | [S114]      |
| Human Glucocerebrosidase Enzyme (GCD)                                    | Carrot cells             | Not reported                              | Recombinant GCD in transgenic plant cells was biologically active. Phase I clinical trial have shown no clinical or laboratory evidence of any significant innate or humoral immune reactions and phase III clinical trial was approved and is currently ongoing | [S115,S116] |
| Thrombomodulin (Solulin)                                                 | Tobacco                  | Upto 115 $\mu\text{g g}^{-1}$ FW          | Not reported                                                                                                                                                                                                                                                     | [S117]      |
| Human cytokine granulocyte macrophage colony stimulating factor (GM-CSF) | Sugarcane                | Undetectable-0.02% TSP                    | Human bone marrow cells (TF-1), which require GM-CSF for cell division, proliferated when growth media was supplemented with transgenic sugarcane extracts and had identical activity levels                                                                     | [S118]      |
| Mouse interleukin-12 (IL-12)                                             | Tomato leaf and fruit    | 2.7-7.3 and 1-3.4 $\mu\text{g g}^{-1}$ FW | Biologically active <i>in vitro</i> . The plant-produced mL-12 induced the secretion of $\text{IFN}\gamma$ by T cells                                                                                                                                            | [S119]      |
| B chain of human Insulin fused to CTB                                    | Tobacco                  | 0.08-0.11% TSP                            | GM1-ELISA showed that the plant-derived fusion protein retained GM1-ganglioside receptor binding specificity                                                                                                                                                     | [S111]      |
| Human basic fibroblast growth factor (bFGF)                              | Soybean                  | 2.3% TSP                                  | Mitogenic assay demonstrated that bFGF stimulated Balb/c 3T3 cells to proliferate in a dose-dependent manner indicting similar biological activity as native bFGF                                                                                                | [S120]      |
| Human granulocyte-colony stimulating factor (hG-CSF)                     | Rice suspension cells    | 0.7% TSP                                  | Plant-derived hG-CSF supports proliferation of the AML-193 cells similar to commercial <i>E. coli</i> -derived hG-CSF                                                                                                                                            | [S121]      |
| Bone morphogenetic protein 2 (BMP2)                                      | Tobacco                  | 0.02% TSP                                 | Application of hBMP2 to mouse C2C12 cell line significantly increased cell ALP activity but lower than commercial rhBMP2                                                                                                                                         | [S122]      |
| Macrophage colony-stimulating factor (M-CSF)1                            | Tobacco                  | 0.02-1.92% TSP                            | Plant-derived M-CSFsR inhibits colony formation of J6-1 cells                                                                                                                                                                                                    | [S123]      |
| Human epidermal growth factor (hEGF)                                     | Tobacco                  | 0.09-0.3% TSP                             | Plant-produced hEGF significantly stimulated Vero E6 cell expansion and proliferation similar to commercial hEGF products                                                                                                                                        | [S124]      |
| Human granulocyte-macrophage colony stimulating factor (hGM-CSF)         | Rice                     | 1.2-1.3% TSP                              | Rice seed-derived hGMCSF induces proliferation of TF-1 cells similar to <i>E. coli</i> -derived hGM-CSF                                                                                                                                                          | [S125]      |
| Human growth hormone (hGH)                                               | Rice suspension cells    | 57 $\text{mg l}^{-1}$                     | The biological activity of shGH accumulated in the transgenic rice cell suspension culture was similar to that of the <i>E. coli</i> -derived recombinant hGH as shown by proliferation of Nb2 node lymphoma cells                                               | [S126]      |
| Human $\beta$ -amyloid (Ab)                                              | Tomato                   | 80 and 58 $\text{ng ml}^{-1}$             | Immunogenic in mice                                                                                                                                                                                                                                              | [S127]      |
| Human $\alpha$ -1-antitrypsin                                            | Tomato                   | 0.44-1.55% TSP                            | Biologically active, showing high specific activity and efficient inhibition of elastase activity                                                                                                                                                                | [S128]      |
| Type II collagen (CII)                                                   | Rice                     | 1 $\mu\text{g seed}^{-1}$                 | Feeding DBA/1 mice with transgenic rice seeds for 2 weeks showed tendencies of lowering and delaying serum specific-IgG2a response against subsequent and repeated intraperitoneal-injection of type II collagen                                                 | [S129]      |
| Human epidermal growth factor (hEGF)                                     | Tobacco (Transient)      | 0.015% TSP                                | Biologically active in cumulus cells expansion assays                                                                                                                                                                                                            | [S105]      |
| Human IA-2 (IA-2ic), a diabetes-associated autoantigen                   | Tobacco (Transient)      | 0.5% TSP                                  | Plant-derived IA-2ic protein is specifically recognized by human IA-2ic autoantibodies                                                                                                                                                                           | [S130]      |
| Human fibroblast growth factor 8 isoform b(FGF8b)                        | Tobacco (Transient)      | 90-150 $\mu\text{g g}^{-1}$ FW            | Plant-expressed FGF8b effectively increased the rate of cell proliferation of NIH3T3 as bacterially expressed mouse FGF8b                                                                                                                                        | [S131]      |
| Human growth hormone (hGH)                                               | Tobacco (TMV)            | ~60 $\text{mg Kg}^{-1}$ FW                | Biologically active in hypophysectomized female Sprague Dawley rats                                                                                                                                                                                              | [S132]      |

**Table S3. Vaccine antigens and biopharmaceuticals expressed via the chloroplast genome**

| Vaccines antigens                      | Expression system     | Expression level                      | Functional evaluation                                                                                                                                                                                                                                                                                                                                                                                                                                      | Refs        |
|----------------------------------------|-----------------------|---------------------------------------|------------------------------------------------------------------------------------------------------------------------------------------------------------------------------------------------------------------------------------------------------------------------------------------------------------------------------------------------------------------------------------------------------------------------------------------------------------|-------------|
| <b>Bacterial antigens</b>              |                       |                                       |                                                                                                                                                                                                                                                                                                                                                                                                                                                            |             |
| Cholera toxin B (CtxB)                 | Tobacco               | 4.1, 8 and 12.3% TSP                  | GM1 ganglioside-binding assay. Long-term protection (50% mouse life span) against CT challenge in both oral (100%) and subcutaneously (89%) immunized mice; protection correlated with CTB-specific IgA and IgG1 titers in oral and IgG1 in subcutaneously immunized mice; increasing numbers of IL10 <sup>+</sup> T-cell but not Foxp3 <sup>+</sup> regulatory T-cells, suppression of IFN- $\gamma$ and absence of IL-17 were observed in protected mice | [S133-S135] |
|                                        | Lettuce               | 4.8 and 9.4% TSP                      |                                                                                                                                                                                                                                                                                                                                                                                                                                                            |             |
| <i>E. coli</i> enterotoxin B (LTB)     | Tobacco               | 2.3-2.5% TSP                          | GM1 ganglioside-binding assay                                                                                                                                                                                                                                                                                                                                                                                                                              | [S136]      |
| Tetanus toxin (TetC)                   | Tobacco               | 18-27 and 7-10% TSP                   | Mice developed systemic immune response and survived the tetanus toxin challenge                                                                                                                                                                                                                                                                                                                                                                           | [S137,S138] |
| Mutant of <i>E. coli</i> toxin (LTK63) | Tobacco               | 3.6-3.7% TSP                          | GM1 ganglioside-binding assay                                                                                                                                                                                                                                                                                                                                                                                                                              | [S139]      |
| Anthrax protective antigen (Pag)       | Tobacco               | 4.5-14.2% TSP                         | Macrophage lysis assay, systemic immune response, toxin neutralization assay, mice survived (100%) challenge with lethal doses of toxin                                                                                                                                                                                                                                                                                                                    | [S140,S141] |
| Lyme disease –OspA (OspA, OspA-T)      | Tobacco               | 1 and 10% TSP                         | Systemic immune response in mice. Protected mice against <i>Borrelia burgdorferi</i>                                                                                                                                                                                                                                                                                                                                                                       | [S142]      |
| Plague F1-V (CaF1-LcV)                 | Tobacco               | 14.8% TSP                             | Immunogenic in mice (IgG1 titers). Oral delivery offered greater protection (88%) and immunity than subcutaneous (33%) injection when challenged with 50-fold lethal dose of aerosolized <i>Y. pestis</i>                                                                                                                                                                                                                                                  | [S143]      |
| <i>E. coli</i> enterotoxin B (LTB)     | Tobacco               | 2.3% TSP                              | GM1 ganglioside-binding assay; oral immunization partially protected mice from CT challenge                                                                                                                                                                                                                                                                                                                                                                | [S144]      |
| Multi-epitope DPT fusion protein       | Tobacco               | 0.8% TSP                              | Immunogenic in orally immunized mice with freeze-dried chloroplast-derived DPT                                                                                                                                                                                                                                                                                                                                                                             | [S145]      |
| <b>Viral antigens</b>                  |                       |                                       |                                                                                                                                                                                                                                                                                                                                                                                                                                                            |             |
| Canine parvovirus (CTB-2L21,GFP-2L21)  | Tobacco               | 31.1 and 22.6% TSP                    | Rabbit sera neutralized CPV in an <i>in vitro</i> assay                                                                                                                                                                                                                                                                                                                                                                                                    | [S146,S147] |
| Hepatitis E virus (HEV E2)             | Tobacco Leaves        | 0.63-1.09 ng and                      | Immune response in mice                                                                                                                                                                                                                                                                                                                                                                                                                                    | [S148]      |
|                                        | Seeds                 | 0.015-0.018 ng $\mu\text{g}^{-1}$ TSP |                                                                                                                                                                                                                                                                                                                                                                                                                                                            |             |
| Swine fever virus (CSFV E2)            | Tobacco               | 1-2% TSP                              | Immune response in mice                                                                                                                                                                                                                                                                                                                                                                                                                                    | [S149]      |
| Human Papillomavirus (L1)              | Tobacco               | 20-26% TSP                            | Induced systemic immune response in mice after intraperitoneal injection, and neutralizing antibodies were detected                                                                                                                                                                                                                                                                                                                                        | [S150]      |
| Human Papillomavirus (L1)              | Tobacco               | 0.1-1.5% TSP                          | Not reported                                                                                                                                                                                                                                                                                                                                                                                                                                               | [S151]      |
| Foot-and-mouth (CTB-VP1)               | <i>Chlamydomonas</i>  | 3-4% TSP                              | Not reported                                                                                                                                                                                                                                                                                                                                                                                                                                               | [S152]      |
| Rotavirus (VP6)                        | Tobacco               |                                       | Not reported                                                                                                                                                                                                                                                                                                                                                                                                                                               | [S153]      |
| P <sub>trc</sub> -VP6                  | Seedlings             | Undetectable                          |                                                                                                                                                                                                                                                                                                                                                                                                                                                            |             |
| P <sub>rrn</sub> -VP6                  | Seedlings             | 3% TSP                                |                                                                                                                                                                                                                                                                                                                                                                                                                                                            |             |
| P <sub>psbA</sub> -VP6                 | Seedlings             | 0.6% TSP                              |                                                                                                                                                                                                                                                                                                                                                                                                                                                            |             |
| Hepatitis C (NS3)                      | Tobacco               | 2% TSP                                | Not reported                                                                                                                                                                                                                                                                                                                                                                                                                                               | [S154]      |
| Partial spike (S) protein of SARS-CoV  | Tobacco               | 0.2% TSP                              | Not reported                                                                                                                                                                                                                                                                                                                                                                                                                                               | [S155]      |
| Epstein-Barr virus (VCA)               | Tobacco               | 0.002-0.004% TSP                      | Not reported                                                                                                                                                                                                                                                                                                                                                                                                                                               | [S156]      |
| Swine fever virus (CSFV E2)            | <i>Chlamydomonas</i>  | 1.5-2% TSP                            | Not reported                                                                                                                                                                                                                                                                                                                                                                                                                                               | [S157]      |
| HIV (p24)                              | Tobacco               | 2.5% TSP                              | Not reported                                                                                                                                                                                                                                                                                                                                                                                                                                               | [S158]      |
| HIV (P24-Nef)                          | Tobacco & Tomato leaf | 40% TSP                               | Not reported                                                                                                                                                                                                                                                                                                                                                                                                                                               | [S159]      |
|                                        | Green Fruit           | 2.5% TSP                              |                                                                                                                                                                                                                                                                                                                                                                                                                                                            |             |
|                                        | Ripe Fruit            | Not detected                          |                                                                                                                                                                                                                                                                                                                                                                                                                                                            |             |
| <b>Protozoan antigens</b>              |                       |                                       |                                                                                                                                                                                                                                                                                                                                                                                                                                                            |             |
| Amoebiasis (LecA)                      | Tobacco               | 7% TSP                                | Systemic immune response in mice                                                                                                                                                                                                                                                                                                                                                                                                                           | [S160]      |
|                                        | Tobacco               | 12.3% TSP                             |                                                                                                                                                                                                                                                                                                                                                                                                                                                            | [S134,S135] |
| Malaria (CTB-ama1 & CTB-msp1)          | Lettuce               | 9.4% TSP                              | Sera of immunized mice completely inhibited proliferation of the malarial parasite and cross-reacted with the native parasite proteins/parasites in immunoblots and immunofluorescence studies, at the ring, trophozoite or schizont parasite stages                                                                                                                                                                                                       |             |
|                                        | Tobacco               | 8% TSP                                |                                                                                                                                                                                                                                                                                                                                                                                                                                                            |             |
|                                        | Lettuce               | 4.8% TSP                              |                                                                                                                                                                                                                                                                                                                                                                                                                                                            |             |

| <b>Autoantigens</b>                                      |                                     |                                       |                                                                                                                                                                                                                                                                                                                                                                                                      |        |
|----------------------------------------------------------|-------------------------------------|---------------------------------------|------------------------------------------------------------------------------------------------------------------------------------------------------------------------------------------------------------------------------------------------------------------------------------------------------------------------------------------------------------------------------------------------------|--------|
| Diabetes – Type 1<br>( <i>CTB-pins</i> )                 | Tobacco and Lettuce                 | ~16% TSP<br>2.05-2.5% TSP             | CTB-prins treated mice showed significant decrease in inflammation (insulinitis) in non-obese diabetic mice; insulin-producing $\beta$ -cells in the pancreatic islets of CTB-Pins-treated mice were highly protected, increase in insulin production with lower blood or urine glucose levels; Increased expression of immunosuppressive cytokines (IL4, IL 10)                                     | [S161] |
| Diabetes – Type 1<br>( <i>hGAD65</i> )                   | <i>Chlamydomonas</i>                | 0.25-0.3% TSP                         | Immunoreactivity to diabetic sera                                                                                                                                                                                                                                                                                                                                                                    | [S162] |
| <b>Biopharmaceutical proteins</b>                        |                                     |                                       |                                                                                                                                                                                                                                                                                                                                                                                                      |        |
| Human somatotropin ( <i>hST</i> )                        | Tobacco                             | 0.2-7.0% TSP                          | Growth response of Nb2 cell line in the presence of somatotropin. Rat lymphoma cell line Nb2 proliferated in proportion to the amount of somatotropin in the culture medium, until saturation is reached                                                                                                                                                                                             | [S163] |
| Interferon gamma ( <i>uidA-IFN-<math>\gamma</math></i> ) | Tobacco                             | 6.0% TSP                              | Protection of human lung carcinoma cells against infection by encephalomyocarditis virus                                                                                                                                                                                                                                                                                                             | [S164] |
| Interferon alpha 2b ( <i>IFN<math>\alpha</math>2b</i> )  | Tobacco<br>LAMD<br><br>Petit havana | 8.0-21.0% TSP<br><br>2.0-14.0% TSP    | Immunogenic in mice. Transgenic IFN- $\alpha$ 2b protected baby hamster kidney cells against cytopathic viral replication in vesicular stomatitis virus cytopathic effect assay, HeLa cells from HIV-1 entry and mice from a highly metastatic tumor line. Also, it increased the expression of major histocompatibility complex class I on splenocytes and the total number of natural killer cells | [S165] |
| Insulin-like growth factor ( <i>IGF-1n, IGF-1s</i> )     | Tobacco                             | 32.4% TSP<br>32.7% TSP                | Growth response in cultured HU-3 cells                                                                                                                                                                                                                                                                                                                                                               | [S166] |
| Human epidermal growth factor ( <i>hEGF</i> )            | Tobacco                             | Not reported (below detection levels) | Not reported                                                                                                                                                                                                                                                                                                                                                                                         | [S167] |
| Human alpha1-antitrypsin ( <i>A1AT</i> )                 | Tobacco                             | 2% TSP                                | Fully active and binds to porcine pancreatic elastase                                                                                                                                                                                                                                                                                                                                                | [S168] |
| Antimicrobial peptide ( <i>MSI-99</i> )                  | Tobacco                             | Not reported                          | Antifungal or antibacterial activities in vitro and in vivo in <i>Pseudomonas aeruginosa</i>                                                                                                                                                                                                                                                                                                         | [S169] |
| Antimicrobial peptide (2 lysin-type protein)             | Tobacco                             | ~ 30% TSP                             | Bacteriolytic activity and kills <i>Streptococcus pneumoniae</i> , the causative agent of pneumonia                                                                                                                                                                                                                                                                                                  | [S170] |
| Human serum albumin ( <i>hsa</i> )                       | Tobacco                             | 0.02-11.1% TSP                        | Not reported                                                                                                                                                                                                                                                                                                                                                                                         | [S171] |
| Human cardiotrophin-1 ( <i>hCT-1</i> )                   | Tobacco                             | 5% TSP                                | Biologically active on human hepatocarcinoma cell line, HepG2 assay                                                                                                                                                                                                                                                                                                                                  | [S172] |
| Monoclonal antibody ( <i>Guy's 13</i> )                  | Tobacco                             | Not Reported                          | Not reported                                                                                                                                                                                                                                                                                                                                                                                         | [S173] |
| Lysozyme antibody fragment ( <i>AbL</i> )                | Tobacco                             | Not detected                          | Not reported                                                                                                                                                                                                                                                                                                                                                                                         | [S174] |

#### Supplementary references

- S1 Haq, T.A. *et al.* (1995) Oral immunization with a recombinant bacterial antigen produced in transgenic plants. *Science* 268, 714-716
- S2 Mason, H.S. *et al.* (1998) Edible vaccine protects mice against *Escherichia coli* heat-labile enterotoxin (LT): potatoes expressing a synthetic LT-B gene. *Vaccine* 16, 1336-1343
- S3 Tacket, C.O. *et al.* (1998) Immunogenicity in humans of a recombinant bacterial antigen delivered in a transgenic potato. *Nat. Med.* 4, 607-609
- S4 Chikwamba, R. *et al.* (2002) A functional antigen in a practical crop: LT-B producing maize protects mice against *Escherichia coli* heat labile enterotoxin (LT) and cholera toxin (CT). *Transgenic Res.* 11, 479-493
- S5 Lamphear, B.J. *et al.* (2002) Delivery of subunit vaccines in maize seed. *J. Control Release* 85, 169-180
- S6 Lauterslager, T.G. *et al.* (2001) Oral immunisation of naive and primed animals with transgenic potato tubers expressing LT-B. *Vaccine* 19, 2749-2755
- S7 Rosales-Mendoza, S. *et al.* (2008) Ingestion of transgenic carrots expressing the *Escherichia coli* heat-labile enterotoxin B subunit protects mice against cholera toxin challenge. *Plant Cell Rep.* 27, 79-84
- S8 Tacket, C.O. *et al.* (2004) Immunogenicity of recombinant LT-B delivered orally to humans in transgenic corn. *Vaccine* 22, 4385-4389
- S9 Moravec, T. *et al.* (2007) Production of *Escherichia coli* heat labile toxin (LT) B subunit in soybean seed and analysis of its immunogenicity as an oral vaccine. *Vaccine* 25, 1647-1657
- S10 Kim, T.G. *et al.* (2007) Synthesis and assembly of *Escherichia coli* heat-labile enterotoxin B subunit in transgenic lettuce (*Lactuca sativa*). *Protein Expr. Purif.* 51, 22-27
- S11 Piller, K.J. *et al.* (2005) Expression and immunogenicity of an *Escherichia coli* K99 fimbriae subunit antigen in soybean. *Planta* 222, 6-18
- S12 Arakawa, T. *et al.* (1997) Expression of cholera toxin B subunit oligomers in transgenic potato plants. *Transgenic Res.* 6, 403-413
- S13 Arakawa, T. *et al.* (1998) Efficacy of a food plant-based oral cholera toxin B subunit vaccine. *Nat. Biotechnol.* 16, 292-297
- S14 Jani, D. *et al.* (2002) Expression of cholera toxin B subunit in transgenic tomato plants. *Transgenic Res.* 11, 447-454
- S15 Jiang, X.L. *et al.* (2007) Cholera toxin B protein in transgenic tomato fruit induces systemic immune response in mice. *Transgenic Res.* 16, 169-175
- S16 Nochi, T. *et al.* (2007) From the Cover: Rice-based mucosal vaccine as a global strategy for cold-chain- and needle-free vaccination. *Proc. Natl. Acad. Sci. U. S. A.* 104, 10986-10991
- S17 Kim, Y.S. *et al.* (2009) Expression and assembly of cholera toxin B subunit (CTB) in transgenic carrot (*Daucus carota* L.). *Mol. Biotechnol.* 41, 8-14
- S18 Oszvald, M. *et al.* (2008) Expression of cholera toxin B subunit in transgenic rice endosperm. *Mol. Biotechnol.* 40, 261-268
- S19 Kim, Y.-S. *et al.* (2006) Expression of a cholera toxin B subunit in transgenic lettuce (*Lactuca sativa* L.) using Agrobacterium-mediated transformation system. *Plant Cell Tiss. Organ Cult.* 87, 203-210

- S20 Sharma, M.K. *et al.* (2008) Expression of accessory colonization factor subunit A (ACFA) of *Vibrio cholerae* and ACFA fused to cholera toxin B subunit in transgenic tomato (*Solanum lycopersicum*). *J. Biotechnol.* 135, 22-27
- S21 Sharma, M.K. *et al.* (2008) Expression of toxin co-regulated pilus subunit A (TCPA) of *Vibrio cholerae* and its immunogenic epitopes fused to cholera toxin B subunit in transgenic tomato (*Solanum lycopersicum*). *Plant Cell Rep.* 27, 307-318
- S22 Aziz, M.A. *et al.* (2002) Expression of protective antigen in transgenic plants: a step towards edible vaccine against anthrax. *Biochem. Biophys. Res. Commun.* 299, 345-351
- S23 Yu, J. and Langridge, W.H. (2001) A plant-based multicomponent vaccine protects mice from enteric diseases. *Nat. Biotechnol.* 19, 548-552
- S24 Yiu, J *et al.* (2008) Transgenic rice expresses an antigenic lipoprotein of *Neisseria gonorrhoeae*. *J. Sci. Food Agric.* 88, 1603-1613
- S25 Brodzik, R. *et al.* (2009) Generation of plant-derived recombinant DTP subunit vaccine. *Vaccine* 27, 3730-3734
- S26 Rigano, M.M. *et al.* (2004) Production of a fusion protein consisting of the enterotoxigenic *Escherichia coli* heat-labile toxin B subunit and a tuberculosis antigen in *Arabidopsis thaliana*. *Plant Cell Rep.* 22, 502-508
- S27 Mason, H.S. *et al.* (1992) Expression of hepatitis B surface antigen in transgenic plants. *Proc. Natl. Acad. Sci. U. S. A.* 89, 11745-11749
- S28 Thanavala, Y. *et al.* (1995) Immunogenicity of transgenic plant-derived hepatitis B surface antigen. *Proc. Natl. Acad. Sci. U. S. A.* 92, 3358-3361
- S29 Thanavala, Y. *et al.* (2005) Immunogenicity in humans of an edible vaccine for hepatitis B. *Proc. Natl. Acad. Sci. U. S. A.* 102, 3378-3382
- S30 Kong, Q. *et al.* (2001) Oral immunization with hepatitis B surface antigen expressed in transgenic plants. *Proc. Natl. Acad. Sci. U. S. A.* 98, 11539-11544
- S31 Richter, L.J. *et al.* (2000) Production of hepatitis B surface antigen in transgenic plants for oral immunization. *Nat. Biotechnol.* 18, 1167-1171
- S32 Kapusta, J. *et al.* (1999) A plant-derived edible vaccine against hepatitis B virus. *FASEB J.* 13, 1796-1799
- S33 Ehsani, P. *et al.* (1997) Polypeptides of hepatitis B surface antigen produced in transgenic potato. *Gene* 190, 107-111
- S34 Kumar, G.B. *et al.* (2005) Expression of hepatitis B surface antigen in transgenic banana plants. *Planta* 222, 484-493
- S35 Gao, Y. *et al.* (2003) Oral immunization of animals with transgenic cherry tomatillo expressing HBsAg. *World J. Gastroenterol.* 9, 996-1002
- S36 Lou, X.M. *et al.* (2007) Expression of the human hepatitis B virus large surface antigen gene in transgenic tomato plants. *Clin. Vaccine Immunol.* 14, 464-469
- S37 Srinivas, L. *et al.* (2008) Transient and stable expression of hepatitis B surface antigen in tomato (*Lycopersicon esculentum* L.). *Plant Biotechnol. Rep.* 2, 1-6
- S38 Joung, Y.H. *et al.* (2004) Expression of the hepatitis B surface S and preS2 antigens in tubers of *Solanum tuberosum*. *Plant Cell Rep.* 22, 925-930
- S39 Youm, J.W. *et al.* (2007) Oral immunogenicity of potato-derived HBsAg middle protein in BALB/c mice. *Vaccine* 25, 577-584
- S40 Qian, B. *et al.* (2008) Immunogenicity of recombinant hepatitis B virus surface antigen fused with preS1 epitopes expressed in rice seeds. *Transgenic Res.* 17, 621-631
- S41 Mason, H.S. *et al.* (1996) Expression of Norwalk virus capsid protein in transgenic tobacco and potato and its oral immunogenicity in mice. *Proc. Natl. Acad. Sci. U. S. A.* 93, 5335-5340
- S42 Tacket, C.O. *et al.* (2000) Human immune responses to a novel norwalk virus vaccine delivered in transgenic potatoes. *J. Infect. Dis.* 182, 302-305
- S43 Zhang, X. *et al.* (2006) Tomato is a highly effective vehicle for expression and oral immunization with Norwalk virus capsid protein. *Plant Biotechnol. J.* 4, 419-432
- S44 Huang, Z. *et al.* (2005) Virus-like particle expression and assembly in plants: hepatitis B and Norwalk viruses. *Vaccine* 23, 1851-1858
- S45 Arakawa, T.Y.J.a.L. (2001) Synthesis of a cholera toxin B subunit-rotavirus NSP4 fusion protein in potato. *Plant Cell Rep.* 20, 343-348
- S46 Matsumura, T. *et al.* (2002) Production of immunogenic VP6 protein of bovine group A rotavirus in transgenic potato plants. *Arch. Virol.* 147, 1263-1270
- S47 Dong, J.L. *et al.* (2005) Oral immunization with pBsVP6-transgenic alfalfa protects mice against rotavirus infection. *Virology* 339, 153-163
- S48 Li, J.T. *et al.* (2006) Immunogenicity of a plant-derived edible rotavirus subunit vaccine transformed over fifty generations. *Virology* 356, 171-178
- S49 Wu, Y.Z. *et al.* (2003) Oral immunization with rotavirus VP7 expressed in transgenic potatoes induced high titers of mucosal neutralizing IgA. *Virology* 313, 337-342
- S50 Huang, Z. *et al.* (2001) Plant-derived measles virus hemagglutinin protein induces neutralizing antibodies in mice. *Vaccine* 19, 2163-2171
- S51 Webster, D.E. *et al.* (2002) Successful boosting of a DNA measles immunization with an oral plant-derived measles virus vaccine. *J. Virol.* 76, 7910-7912
- S52 Marquet-Blouin, E. *et al.* (2003) Neutralizing immunogenicity of transgenic carrot (*Daucus carota* L.)-derived measles virus hemagglutinin. *Plant Mol. Biol.* 51, 459-469
- S53 Pogrebnyak, N. *et al.* (2005) Severe acute respiratory syndrome (SARS) S protein production in plants: development of recombinant vaccine. *Proc. Natl. Acad. Sci. U. S. A.* 102, 9062-9067
- S54 Sandhu, J.S. *et al.* (2000) Oral immunization of mice with transgenic tomato fruit expressing respiratory syncytial virus-F protein induces a systemic immune response. *Transgenic Res.* 9, 127-135
- S55 Tackaberry, E.S. *et al.* (1999) Development of biopharmaceuticals in plant expression systems: cloning, expression and immunological reactivity of human cytomegalovirus glycoprotein B (UL55) in seeds of transgenic tobacco. *Vaccine* 17, 3020-3029
- S56 Tackaberry, E.S. *et al.* (2008) Sustained expression of human cytomegalovirus glycoprotein B (UL55) in the seeds of homozygous rice plants. *Mol. Biotechnol.* 40, 1-12
- S57 Golovkin, M. *et al.* (2007) Smallpox subunit vaccine produced in *Planta* confers protection in mice. *Proc. Natl. Acad. Sci. U. S. A.* 104, 6864-6869
- S58 Warzecha, H. *et al.* (2003) Oral immunogenicity of human papillomavirus-like particles expressed in potato. *J. Virol.* 77, 8702-8711
- S59 Kohl, T.O. *et al.* (2007) Expression of HPV-11 L1 protein in transgenic *Arabidopsis thaliana* and *Nicotiana tabacum*. *BMC. Biotechnol.* 7:56, 56
- S60 Biemelt, S. *et al.* (2003) Production of human papillomavirus type 16 virus-like particles in transgenic plants. *J. Virol.* 77, 9211-9220
- S61 Shchelkunov, S.N. *et al.* (2006) Immunogenicity of a novel, bivalent, plant-based oral vaccine against hepatitis B and human immunodeficiency viruses. *Biotechnol. Lett.* 28, 959-967
- S62 Lindh, I. *et al.* (2008) Feeding of mice with *Arabidopsis thaliana* expressing the HIV-1 subtype C p24 antigen gives rise to systemic immune responses. *APMIS* 116, 985-994
- S63 Matoba, N. *et al.* (2009) Biochemical and immunological characterization of the plant-derived candidate human immunodeficiency virus type 1 mucosal vaccine CTB-MPR. *Plant Biotechnol. J.* 7, 129-145
- S64 Wang, Y. *et al.* (2009) Generation and immunogenicity of Japanese encephalitis virus envelope protein expressed in transgenic rice. *Biochem. Biophys. Res. Commun.* 380, 292-297
- S65 Gil, F. *et al.* (2001) High-yield expression of a viral peptide vaccine in transgenic plants. *FEBS Lett.* 488, 13-17
- S66 Pogrebnyak, N. *et al.* (2006) Collard and cauliflower as a base for production of recombinant antigens. *Plant Sci.* 171, 677-685
- S67 Ashraf, S. *et al.* (2005) High level expression of surface glycoprotein of rabies virus in tobacco leaves and its immunoprotective activity in mice. *J. Biotechnol.* 119, 1-14
- S68 Brodzik, R. *et al.* (2008) Plant-derived EpCAM antigen induces protective anti-cancer response. *Cancer Immunol. Immunother.* 57, 317-323
- S69 Wang, L. *et al.* (2008) Immunogenicity of *Plasmodium yoelii* merozoite surface protein 4/5 produced in transgenic plants. *Int. J. Parasitol.* 38, 103-110
- S70 Zelada, A.M. *et al.* (2006) Expression of tuberculosis antigen ESAT-6 in *Nicotiana tabacum* using a potato virus X-based vector. *Tuberculosis* 86, 263-267
- S71 Mett, V. *et al.* (2007) A plant-produced plague vaccine candidate confers protection to monkeys. *Vaccine* 25, 3014-3017
- S72 Chichester, J.A. *et al.* (2009) A single component two-valent LcrV-F1 vaccine protects non-human primates against pneumonic plague. *Vaccine* 27, 3471-3474
- S73 Santi, L. *et al.* (2006) Protection conferred by recombinant *Yersinia pestis* antigens produced by a rapid and highly scalable plant expression system. *Proc. Natl. Acad. Sci. U. S. A.* 103, 861-866



- S74 Brennan, F.R. *et al.* (1999) Immunogenicity of peptides derived from a fibronectin-binding protein of *S. aureus* expressed on two different plant viruses. *Vaccine* 17, 1846-1857
- S75 Brennan, F.R. *et al.* (1999) *Pseudomonas aeruginosa* outer-membrane protein F epitopes are highly immunogenic in mice when expressed on a plant virus. *Microbiology* 145, 211-220
- S76 Staczek, J. *et al.* (2000) Immunization with a chimeric tobacco mosaic virus containing an epitope of outer membrane protein F of *Pseudomonas aeruginosa* provides protection against challenge with *P. aeruginosa*. *Vaccine* 18, 2266-2274
- S77 Chichester, J.A. *et al.* (2007) Immunogenicity of a subunit vaccine against *Bacillus anthracis*. *Vaccine* 25, 3111-3114
- S78 Brodzik, R. *et al.* (2005) Advances in alfalfa mosaic virus-mediated expression of anthrax antigen in planta. *Biochem. Biophys. Res. Commun.* 338, 717-722
- S79 Porta, C. *et al.* (1994) Development of cowpea mosaic virus as a high-yielding system for the presentation of foreign peptides. *Virology* 202, 949-955
- S80 Yusibov, V. *et al.* (1997) Antigens produced in plants by infection with chimeric plant viruses immunize against rabies virus and HIV-1. *Proc. Natl. Acad. Sci. U. S. A.* 94, 5784-5788
- S81 Joelson, T. *et al.* (1997) Presentation of a foreign peptide on the surface of tomato bushy stunt virus. *J. Gen. Virol.* 78, 1213-1217
- S82 McLain, L. *et al.* (1996) Stimulation of neutralizing antibodies to human immunodeficiency virus type 1 in three strains of mice immunized with a 22 amino acid peptide of gp41 expressed on the surface of a plant virus. *Vaccine* 14, 799-810
- S83 Durrani, Z. *et al.* (1998) Intranasal immunization with a plant virus expressing a peptide from HIV-1 gp41 stimulates better mucosal and systemic HIV-1-specific IgA and IgG than oral immunization. *J. Immunol. Methods* 220, 93-103
- S84 Marusic, C. *et al.* (2001) Chimeric plant virus particles as immunogens for inducing murine and human immune responses against human immunodeficiency virus type 1. *J. Virol.* 75, 8434-8439
- S85 O'Keefe, B.R. *et al.* (2009) Scaleable manufacture of HIV-1 entry inhibitor griffithsin and validation of its safety and efficacy as a topical microbicide component. *Proc. Natl. Acad. Sci. U. S. A.* 106, 6099-6104
- S86 Belanger, H. *et al.* (2000) Human respiratory syncytial virus vaccine antigen produced in plants. *FASEB J.* 14, 2323-2328
- S87 Yusibov, V. *et al.* (2002) Expression in plants and immunogenicity of plant virus-based experimental rabies vaccine. *Vaccine* 20, 3155-3164
- S88 Portocarrero, C. *et al.* (2008) Immunogenic properties of plant-derived recombinant smallpox vaccine candidate pB5. *Vaccine* 26, 5535-5540
- S89 Franconi, R. *et al.* (2002) Plant-derived human papillomavirus 16 E7 oncoprotein induces immune response and specific tumor protection. *Cancer Res.* 62, 3654-3658
- S90 O'Brien, G.J. *et al.* (2000) Rotavirus VP6 expressed by PVX vectors in *Nicotiana benthamiana* coats PVX rods and also assembles into viruslike particles. *Virology* 270, 444-453
- S91 Massa, S. *et al.* (2007) Anti-cancer activity of plant-produced HPV16 E7 vaccine. *Vaccine* 25, 3018-3021
- S92 Venuti, A. *et al.* (2009) An E7-based therapeutic vaccine protects mice against HPV16 associated cancer. *Vaccine* 27, 3395-3397
- S93 Saejung, W. *et al.* (2007) Production of dengue 2 envelope domain III in plant using TMV-based vector system. *Vaccine* 25, 6646-6654
- S94 Shoji, Y. *et al.* (2009) Plant-derived hemagglutinin protects ferrets against challenge infection with the A/Indonesia/05/05 strain of avian influenza. *Vaccine* 27, 1087-1092
- S95 Shoji, Y. *et al.* (2009) Immunogenicity of hemagglutinin from A/Bar-headed Goose/Qinghai/1A/05 and A/Anhui/1/05 strains of H5N1 influenza viruses produced in *Nicotiana benthamiana* plants. *Vaccine* 27, 3467-3470
- S96 Spitsin, S. *et al.* (2009) Immunological assessment of plant-derived avian flu H5/HA1 variants. *Vaccine* 27, 1289-1292
- S97 Magnuson, N.S. *et al.* (1998) Secretion of biologically active human interleukin-2 and interleukin-4 from genetically modified tobacco cells in suspension culture. *Protein Expr. Purif.* 13, 45-52
- S98 Terashima, M. *et al.* (1999) Production of functional human alpha 1-antitrypsin by plant cell culture. *Appl. Microbiol. Biotechnol.* 52, 516-523
- S99 Leite, A. *et al.* (2000) Expression of correctly processed human growth hormone in seeds of transgenic tobacco plants. *Mol. Breed.* 6, 47-53
- S100 Farran, I. *et al.* (2002) Targeted expression of human serum albumin to potato tubers. *Transgenic Res.* 11, 337-346
- S101 Huang, J. *et al.* (2002) Expression of functional recombinant human lysozyme in transgenic rice cell culture. *Transgenic Res.* 11, 229-239
- S102 Shin, Y.J. *et al.* (2003) High level of expression of recombinant human granulocyte-macrophage colony stimulating factor in transgenic rice cell suspension culture. *Biotechnol. Bioeng.* 82, 778-783
- S103 Zhang, B. *et al.* (2003) Expression and production of bioactive human interleukin-18 in transgenic tobacco plants. *Biotechnol. Lett.* 25, 1629-1635
- S104 Chen, T.L. *et al.* (2004) Expression of bioactive human interferon-gamma in transgenic rice cell suspension cultures. *Transgenic Res.* 13, 499-510
- S105 Wirth, S. *et al.* (2004) Expression of active human epidermal growth factor (hEGF) in tobacco plants by integrative and non-integrative systems. *Mol. Breed.* 13, 23-35
- S106 Panahi, M. *et al.* (2004) Recombinant protein expression plasmids optimized for industrial *E. coli* fermentation and plant systems produce biologically active human insulin-like growth factor-1 in transgenic rice and tobacco plants. *Transgenic Res.* 13, 245-259
- S107 Cheung, S.C. *et al.* (2009) Expression and subcellular targeting of human insulin-like growth factor binding protein-3 in transgenic tobacco plants. *Transgenic Res.* DOI 10.1007/s11248-009-9286-8
- S108 Xie, T. *et al.* (2008) A biologically active rhIGF-1 fusion accumulated in transgenic rice seeds can reduce blood glucose in diabetic mice via oral delivery. *Peptides* 29, 1862-1870
- S109 Arakawa, T. *et al.* (1998) A plant-based cholera toxin B subunit-insulin fusion protein protects against the development of autoimmune diabetes. *Nat. Biotechnol.* 16, 934-938
- S110 Nykiforuk, C.L. *et al.* (2006) Transgenic expression and recovery of biologically active recombinant human insulin from *Arabidopsis thaliana* seeds. *Plant Biotechnol. J.* 4, 77-85
- S111 Li, D. *et al.* (2006) Expression of cholera toxin B subunit and the B chain of human insulin as a fusion protein in transgenic tobacco plants. *Plant Cell Rep.* 25, 417-424
- S112 Ma, S. *et al.* (2004) Induction of oral tolerance to prevent diabetes with transgenic plants requires glutamic acid decarboxylase (GAD) and IL-4. *Proc. Natl. Acad. Sci. U. S. A.* 101, 5680-5685
- S113 Nandi, S. *et al.* (2005) Process development and economic evaluation of recombinant human lactoferrin expressed in rice grain. *Transgenic Res.* 14, 237-249
- S114 Reggi, S. *et al.* (2005) Recombinant human acid beta-glucosidase stored in tobacco seed is stable, active and taken up by human fibroblasts. *Plant Mol. Biol.* 57, 101-113
- S115 Aviezer, D. *et al.* (2009) A plant-derived recombinant human glucocerebrosidase enzyme--a preclinical and phase I investigation. *PLoS ONE* 4, e4792
- S116 Shaaltiel, Y. *et al.* (2007) Production of glucocerebrosidase with terminal mannose glycans for enzyme replacement therapy of Gaucher's disease using a plant cell system. *Plant Biotechnol. J.* 5, 579-590
- S117 Schinkel, H. *et al.* (2005) Production of an active recombinant thrombomodulin derivative in transgenic tobacco plants and suspension cells. *Transgenic Res.* 14, 251-259
- S118 Wang, M.L. *et al.* (2005) Production of biologically active GM-CSF in sugarcane: a secure biofactory. *Transgenic Res.* 14, 167-178
- S119 Gutierrez-Ortega, A. *et al.* (2005) Expression of functional interleukin-12 from mouse in transgenic tomato plants. *Transgenic Res.* 14, 877-885

- S120 Ding, S.H. *et al.* (2006) High-level expression of basic fibroblast growth factor in transgenic soybean seeds and characterization of its biological activity. *Biotechnol. Lett.* 28, 869-875
- S121 Hong, S.Y. *et al.* (2006) Production of bioactive human granulocyte-colony stimulating factor in transgenic rice cell suspension cultures. *Protein Expr. Purif.* 47, 68-73
- S122 Suo, G. *et al.* (2006) Expression of active hBMP2 in transgenic tobacco plants. *Plant Cell Rep.* 25, 1316-1324
- S123 Zheng, G.G. *et al.* (2006) Expression of bioactive human M-CSF soluble receptor in transgenic tobacco plants. *Protein Expr. Purif.* 46, 367-373
- S124 Bai, J.Y. *et al.* (2007) Expression and characteristic of synthetic human epidermal growth factor (hEGF) in transgenic tobacco plants. *Biotechnol. Lett.* 29, 2007-2012
- S125 Sardana, R. *et al.* (2007) Biologically active human GM-CSF produced in the seeds of transgenic rice plants. *Transgenic Res.* 16, 713-721
- S126 Kim, T.G. *et al.* (2008) Expression of human growth hormone in transgenic rice cell suspension culture. *Plant Cell Rep.* 27, 885-891
- S127 Youm, J.W. *et al.* (2008) Transgenic tomatoes expressing human beta-amyloid for use as a vaccine against Alzheimer's disease. *Biotechnol Lett.* 30, 1839-1845
- S128 Agarwal, S. *et al.* (2008) Expression of modified gene encoding functional human alpha-1-antitrypsin protein in transgenic tomato plants. *Transgenic Res.* 17, 881-896
- S129 Hashizume, F. *et al.* (2008) Development and evaluation of transgenic rice seeds accumulating a type II-collagen tolerogenic peptide. *Transgenic Res.* 17, 1117-1129
- S130 Mett, V. *et al.* (2007) Engineering and expression of the intracellular domain of insulinoma-associated tyrosine phosphatase (IA-2ic), a type 1 diabetes autoantigen, in plants. *Transgenic Res.* 16, 77-84
- S131 Potula, H.H. *et al.* (2008) Transient expression, purification and characterization of bioactive human fibroblast growth factor 8b in tobacco plants. *Transgenic Res.* 17, 19-32
- S132 Rabindran, S. *et al.* (2009) Plant-produced human growth hormone shows biological activity in a rat model. *Biotechnol. Prog.* 25, 530-534
- S133 Daniell, H. *et al.* (2001) Expression of the native cholera toxin B subunit gene and assembly as functional oligomers in transgenic tobacco chloroplasts. *J. Mol. Biol.* 311, 1001-1009
- S134 Davoodi-Semiromi, A. *et al.* (2009) The Green Vaccine: A global strategy to combat infectious and autoimmune diseases. *Human vaccines* 7, 23
- S135 Davoodi-Semiromi, A. *et al.* (2009) A green vaccine confers dual immunity against cholera and malaria by oral and injectable immunization. *Plant Biotechnol. J.* In press
- S136 Kang, T.J. *et al.* (2003) Expression of the B subunit of *E. coli* heat-labile enterotoxin in the chloroplasts of plants and its characterization. *Transgenic Res.* 12, 683-691
- S137 Tregoning, J.S. *et al.* (2003) Expression of tetanus toxin Fragment C in tobacco chloroplasts. *Nucleic Acids Res.* 31, 1174-1179
- S138 Tregoning, J.S. *et al.* (2005) Protection against tetanus toxin using a plant-based vaccine. *Eur. J. Immunol.* 35, 1320-1326
- S139 Kang, T.J. *et al.* (2004) Enhanced expression of B-subunit of *Escherichia coli* heat-labile enterotoxin in tobacco by optimization of coding sequence. *Appl. Biochem. Biotechnol.* 117, 175-187
- S140 Koya, V. *et al.* (2005) Plant-based vaccine: mice immunized with chloroplast-derived anthrax protective antigen survive anthrax lethal toxin challenge. *Infect. Immun.* 73, 8266-8274
- S141 Watson, J. *et al.* (2004) Expression of *Bacillus anthracis* protective antigen in transgenic chloroplasts of tobacco, a non-food/feed crop. *Vaccine* 22, 4374-4384
- S142 Glenz, K. *et al.* (2006) Production of a recombinant bacterial lipoprotein in higher plant chloroplasts. *Nat. Biotechnol.* 24, 76-77
- S143 Arlen, P.A. *et al.* (2008) Effective plague vaccination via oral delivery of plant cells expressing F1-V antigens in chloroplasts. *Infect. Immun.* 76, 3640-3650
- S144 Rosales-Mendoza, S. *et al.* (2009) Expression of an *Escherichia coli* antigenic fusion protein comprising the heat labile toxin B subunit and the heat stable toxin, and its assembly as a functional oligomer in transplastomic tobacco plants. *Plant J.* 57, 45-54
- S145 Soria-Guerra, R.E. *et al.* (2009) Expression of a multi-epitope DPT fusion protein in transplastomic tobacco plants retains both antigenicity and immunogenicity of all three components of the functional oligomer. *Planta* 229, 1293-1302
- S146 Molina, A. *et al.* (2004) High-yield expression of a viral peptide animal vaccine in transgenic tobacco chloroplasts. *Plant Biotechnol. J.* 2, 141-153
- S147 Molina, A. *et al.* (2005) Induction of neutralizing antibodies by a tobacco chloroplast-derived vaccine based on a B cell epitope from canine parvovirus. *Virology* 342, 266-275
- S148 Zhou, Y.X. *et al.* (2006) A truncated hepatitis E virus ORF2 protein expressed in tobacco plastids is immunogenic in mice. *World J. Gastroenterol.* 12, 306-312
- S149 Shao, H.B. *et al.* (2008) The expression of classical swine fever virus structural protein E2 gene in tobacco chloroplasts for applying chloroplasts as bioreactors. *C. R. Biol.* 331, 179-184
- S150 Fernandez-San Millan, A. *et al.* (2008) Human papillomavirus L1 protein expressed in tobacco chloroplasts self-assembles into virus-like particles that are highly immunogenic. *Plant Biotechnol. J.* 6, 427-441
- S151 Lenzi, P. *et al.* (2008) Translational fusion of chloroplast-expressed human papillomavirus type 16 L1 capsid protein enhances antigen accumulation in transplastomic tobacco. *Transgenic Res.* 17, 1091-1102
- S152 Sun, M. *et al.* (2003) Foot-and-mouth disease virus VP1 protein fused with cholera toxin B subunit expressed in *Chlamydomonas reinhardtii* chloroplast. *Biotechnol. Lett.* 25, 1087-1092
- S153 Birch-Machin, I. *et al.* (2004) Accumulation of rotavirus VP6 protein in chloroplasts of transplastomic tobacco is limited by protein stability. *Plant Biotechnol. J.* 2, 261-270
- S154 Daniell, H. *et al.* (2005) Chloroplast-derived vaccine antigens and other therapeutic proteins. *Vaccine* 23, 1779-1783
- S155 Li, H.Y. *et al.* (2006) Accumulation of recombinant SARS-CoV spike protein in plant cytosol and chloroplasts indicate potential for development of plant-derived oral vaccines. *Exp. Biol. Med.* 231, 1346-1352
- S156 Lee, M.Y. *et al.* (2006) Expression of viral capsid protein antigen against Epstein-Barr virus in plastids of *Nicotiana tabacum* cv. SR1. *Biotechnol. Bioeng.* 94, 1129-1137
- S157 He, D.M. *et al.* (2007) Recombination and expression of classical swine fever virus (CSFV) structural protein E2 gene in *Chlamydomonas reinhardtii* chloroplasts. *Colloids Surf. B. Biointerfaces* 55, 26-30
- S158 McCabe, M.S. *et al.* (2008) Plastid transformation of high-biomass tobacco variety Maryland Mammoth for production of human immunodeficiency virus type 1 (HIV-1) p24 antigen. *Plant Biotechnol. J.* 2008 Sep. 2, 9, 914-929
- S159 Zhou, F. *et al.* (2008) High-level expression of human immunodeficiency virus antigens from the tobacco and tomato plastid genomes. *Plant Biotechnol. J.* 6, 897-913
- S160 Chebolu, S. and Daniell, H. (2007) Stable expression of Gal/GalNAc lectin of *Entamoeba histolytica* in transgenic chloroplasts and immunogenicity in mice towards vaccine development for amoebiasis. *Plant Biotechnol. J.* 5, 230-239
- S161 Ruhlman, T. *et al.* (2007) Expression of cholera toxin B-proinsulin fusion protein in lettuce and tobacco chloroplasts—oral administration protects against development of insulinitis in non-obese diabetic mice. *Plant Biotechnol. J.* 5, 495-510
- S162 Wang, X. *et al.* (2008) A novel expression platform for the production of diabetes-associated autoantigen human glutamic acid decarboxylase (hGAD65). *BMC. Biotechnol.* 8, 87
- S163 Staub, J.M. *et al.* (2000) High-yield production of a human therapeutic protein in tobacco chloroplasts. *Nat. Biotechnol.* 18, 333-338
- S164 Leelavathi, S. and Reddy, V. (2003) Chloroplast expression of His-tagged GUS-fusions: a general strategy to overproduce and purify foreign proteins using transplastomic plants as bioreactors. *Mol. Breed.* 11, 49-58
- S165 Arlen, P.A. *et al.* (2007) Field production and functional evaluation of chloroplast-derived interferon-alpha2b. *Plant Biotechnol. J.* 5, 511-525

- S166 Daniell, H. *et al.* (2009) Optimization of codon composition and regulatory elements for expression of human insulin like growth factor-1 in transgenic chloroplasts and evaluation of structural identity and function. *BMC. Biotechnol.* 9, 23
- S167 Wirth, S. *et al.* (2006) Accumulation of hEGF and hEGF-fusion proteins in chloroplast-transformed tobacco plants is higher in the dark than in the light. *J. Biotechnol.* 125, 159-172
- S168 Nadai, M. *et al.* (2008) High-level expression of active human alpha1-antitrypsin in transgenic tobacco chloroplasts. *Transgenic Res.* 18, 173-183
- S169 DeGray, G. *et al.* (2001) Expression of an antimicrobial peptide via the chloroplast genome to control phytopathogenic bacteria and fungi. *Plant Physiol.* 127, 852-862
- S170 Oey, M. *et al.* (2009) Plastid production of protein antibiotics against pneumonia via a new strategy for high-level expression of antimicrobial proteins. *Proc. Natl. Acad. Sci. U. S. A.* 106, 6579-6584
- S171 Fernandez-San Millan, A. *et al.* (2003) A chloroplast transgenic approach to hyper-express and purify Human Serum Albumin, a protein highly susceptible to proteolytic degradation. *Plant Biotechnol. J.* 1, 71-79
- S172 Farran, I. *et al.* (2008) High-density seedling expression system for the production of bioactive human cardiotrophin-1, a potential therapeutic cytokine, in transgenic tobacco chloroplasts. *Plant Biotechnol. J.* 6, 516-527
- S173 Daniell, H. *et al.* (2004) Chloroplast derived antibodies, biopharmaceuticals and edible vaccines. In *In Molecular Farming* (eds. Fischer, R and Schillberg, S.), Verlag publishers
- S174 Magee, A.M. *et al.* (2004) T7 RNA polymerase-directed expression of an antibody fragment transgene in plastids causes a semi-lethal pale-green seedling phenotype. *Transgenic Res.* 13, 325-337
